# Supplementary material for: A UPLC-MS/MS application for comparisons of the hepatotoxicity of raw and processed Xanthii Fructus by energy metabolites
Source: Royal Society of Chemistry journal article supplement (doi:10.1039/c8ra08272c), 2019-01-01
Supplement: c8ra08272c1.pdf [file c8ra08272c1.pdf]

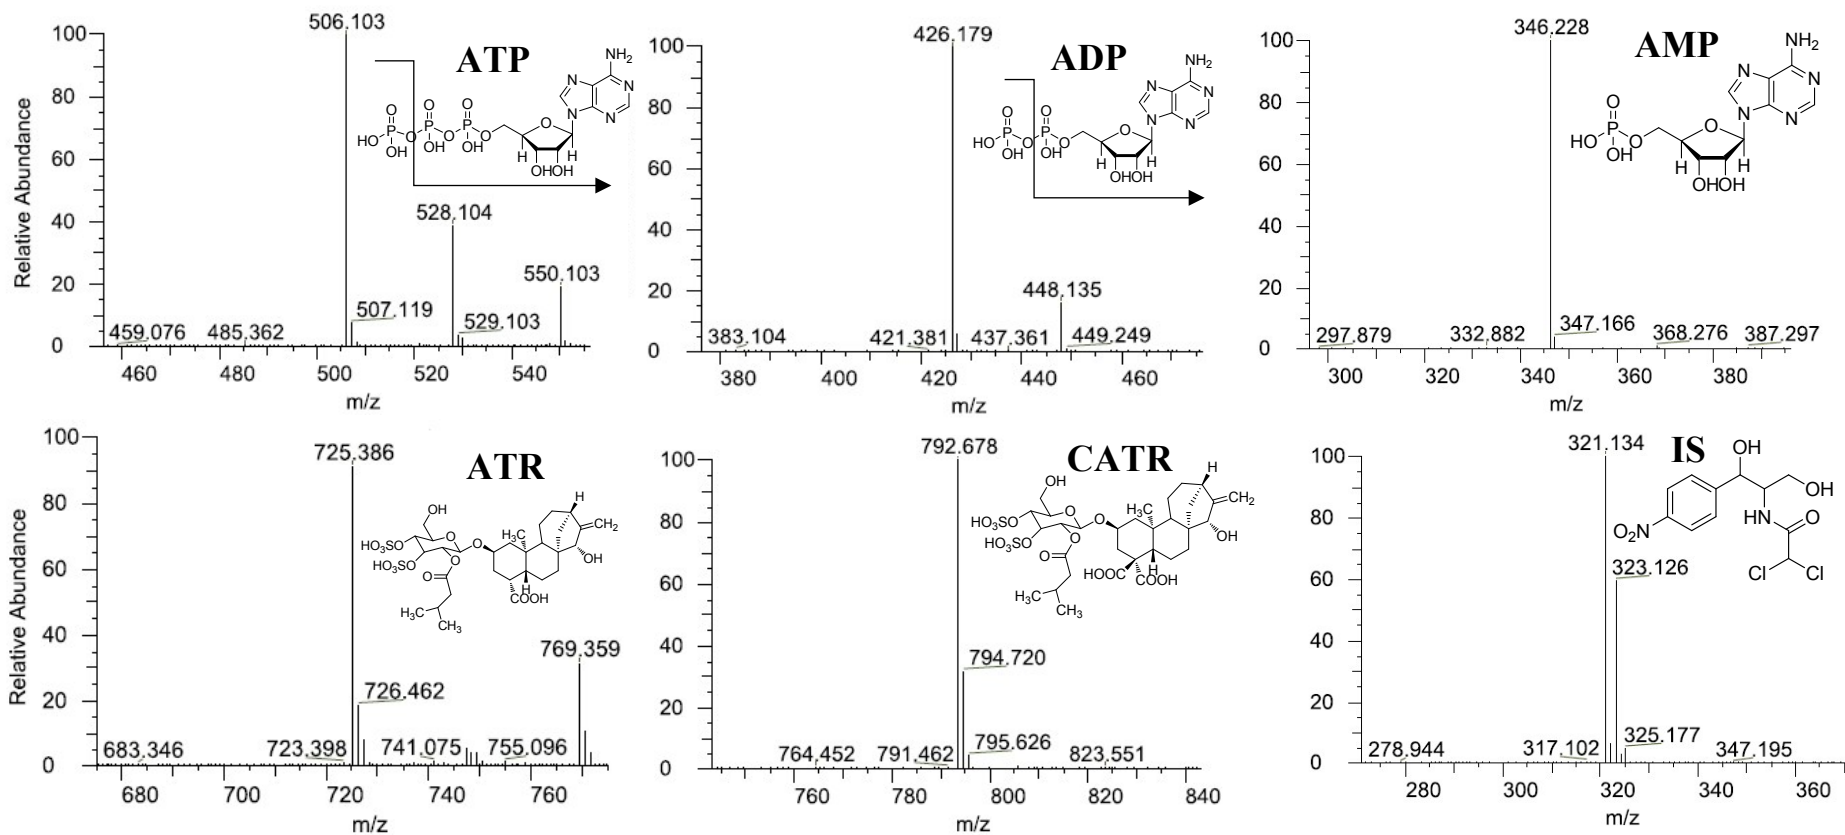

Figure 1. S. Chemical structures and full scan product ion of precursor ions of ATP, ADP, AMP, ATR, CATR and IS.

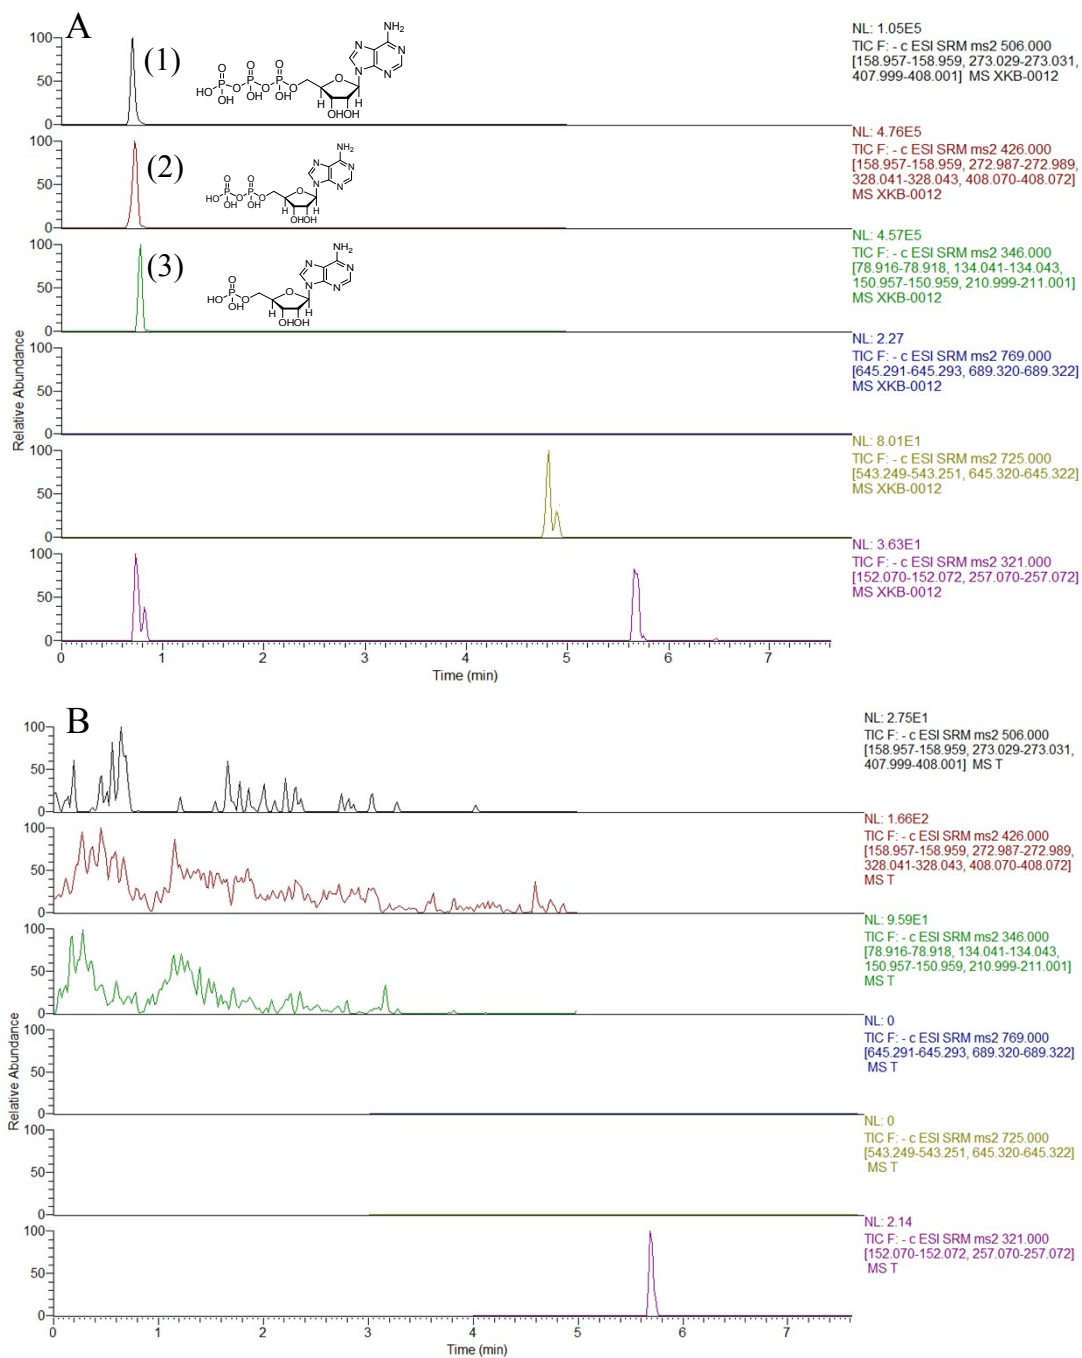

**Figure 2S.** The UPLC–MS/MS analysis SRM chromatogram of 5 analytes: ATP (1), ADP (2), AMP (3), ATR (4), CATR (5) and IS (6) in different matrix.

**Table 1S****The content of ATR and CATR in the RXF and PXF ( $\mu\text{g/g}$ )**

| Analyte                     | Sample | Raw Xanthii Fructus (RXF) | Processed Xanthii Fructus (PXF) |
|-----------------------------|--------|---------------------------|---------------------------------|
| atractyloside (ATR)         |        | 875.2 $\pm$ 46.9          | 1170.3 $\pm$ 49.3               |
| carboxyatractyloside (CATR) |        | 8199.0 $\pm$ 67.9         | 2977.3 $\pm$ 43.5               |

**Table 2S. Accuracy and precision of the method for the ATP, ADP and AMP (n=6)**

| Analyte | Background<br>(ng/mL) | Spiked<br>(ng/mL) | Mean found<br>(ng/mL) | Recovery (%) | RSD (%)   |           |
|---------|-----------------------|-------------------|-----------------------|--------------|-----------|-----------|
|         |                       |                   |                       |              | Intra-day | Inter-day |
| ATP     | 504.4                 | 400               | 896.4                 | 98.0         | 1.50      | 2.43      |
|         |                       | 500               | 992.7                 | 97.7         | 1.73      | 2.00      |
|         |                       | 605               | 1101.9                | 98.5         | 1.49      | 2.31      |
| ADP     | 350.7                 | 280               | 622.6                 | 97.7         | 0.87      | 1.88      |
|         |                       | 350               | 705.5                 | 101.4        | 0.99      | 1.03      |
|         |                       | 420               | 769.8                 | 99.7         | 0.76      | 1.34      |
| AMP     | 250.5                 | 200               | 447.6                 | 98.4         | 0.26      | 0.77      |
|         |                       | 250               | 501.2                 | 100.2        | 0.45      | 0.96      |
|         |                       | 300               | 549.7                 | 99.7         | 0.58      | 1.34      |

**Table 3S****Accuracy and precision of the method for the CATR and ATR (n=6)**

| Analyte | Spiked<br>concentration<br>(ng/mL) | Intra-day          |          |           | Inter-day          |          |           |
|---------|------------------------------------|--------------------|----------|-----------|--------------------|----------|-----------|
|         |                                    | Measured           | Accuracy | Precision | Measured           | Accuracy | Precision |
|         |                                    | (ng/mL)            | (RE, %)  | (RSD, %)  | (ng/mL)            | (RE, %)  | (RSD, %)  |
| CTAR    | 725.2                              | 720.7 $\pm$ 11.42  | -0.62    | 1.58      | 730.05 $\pm$ 14.77 | 0.67     | 2.02      |
|         | 145.0                              | 140.6 $\pm$ 4.49   | -3.03    | 3.19      | 145.51 $\pm$ 12.48 | -0.34    | 8.58      |
|         | 14.5                               | 15.03 $\pm$ 0.88   | 3.65     | 5.91      | 15.70 $\pm$ 1.48   | 8.27     | 9.45      |
| ATR     | 740.0                              | 727.10 $\pm$ 14.84 | -1.74    | 2.04      | 725.43 $\pm$ 15.84 | -1.96    | 2.18      |
|         | 148.0                              | 145.50 $\pm$ 4.42  | -1.68    | 3.04      | 142.33 $\pm$ 4.96  | -3.83    | 3.48      |
|         | 14.8                               | 13.88 $\pm$ 1.14   | -6.21    | 8.23      | 14.35 $\pm$ 1.30   | -3.04    | 9.08      |

**Table 4S**

**Extract recoveries and matrix effects of CTAR and ATR in liver tissue samples**

| Analyte | Spiked concentration<br>(ng/mL) | Recovery |         | Matrix effect |         |
|---------|---------------------------------|----------|---------|---------------|---------|
|         |                                 | Mean (%) | RSD (%) | Mean (%)      | RSD (%) |
| CATR    | 725.2                           | 97.57    | 0.50    | 97.65         | 0.69    |
|         | 145.0                           | 91.52    | 3.59    | 92.29         | 3.27    |
|         | 14.5                            | 89.42    | 4.12    | 91.56         | 4.55    |
| ATR     | 740.0                           | 96.72    | 1.51    | 96.98         | 1.56    |
|         | 148.0                           | 92.97    | 3.11    | 91.49         | 5.14    |
|         | 14.8                            | 86.35    | 6.86    | 86.49         | 7.76    |
| IS      | 100.0                           | 96.5     | 3.18    | 100.5         | 3.15    |

**Table 5S****Stability evaluation of samples stored at -20 °C for on weeks (n=6)**

| Analyte | concentration<br>(ng/mL) | Stability |      |
|---------|--------------------------|-----------|------|
|         |                          | Mean      | RSD  |
| CATR    | 725.2                    | 719.6     | 0.84 |
|         | 145.0                    | 142.7     | 1.09 |
|         | 14.5                     | 13.8      | 4.56 |
| ATR     | 740.0                    | 727.7     | 1.59 |
|         | 148.0                    | 144.0     | 1.67 |
|         | 14.8                     | 13.8      | 3.40 |

**Table 6S****The analytical of the ATR and CATR in group II's liver tissues (ng/g)**

| <b>Sample no.</b> | <b>ATR</b>   | <b>CATR</b> | <b>Sample no.</b> | <b>ATR</b>   | <b>CATR</b> | <b>Sample no.</b> | <b>ATR</b>     | <b>CATR</b>    |
|-------------------|--------------|-------------|-------------------|--------------|-------------|-------------------|----------------|----------------|
| <b>R10-1</b>      | 144.91       | --*         | <b>R20-1</b>      | 164.34       | 80.76       | <b>R30-1</b>      | 179.77         | 100.23         |
| <b>R10-2</b>      | 92.72        | --          | <b>R20-2</b>      | 172.66       | 48.92       | <b>R30-2</b>      | 280.31         | 194.71         |
| <b>R10-3</b>      | 160.61       | --          | <b>R20-3</b>      | 161.60       | 89.76       | <b>R30-3</b>      | 216.34         | 125.12         |
| <b>R10-4</b>      | 121.91       | —           | <b>R20-4</b>      | 221.26       | 48.67       | <b>R30-4</b>      | 195.67         | 110.77         |
| <b>R10-5</b>      | 174.20       | 15.45       | <b>R20-5</b>      | 106.62       | 87.54       | <b>R30-5</b>      | 159.64         | 160.77         |
| <b>R10-6</b>      | 145.20       | --          | <b>R20-6</b>      | 208.10       | 62.98       | <b>R30-6</b>      | 278.30         | 197.61         |
| <b>Mean ± SD</b>  | 139.92±29.01 | --          | <b>Mean ± SD</b>  | 172.43±40.42 | 69.77±18.77 | <b>Mean ± SD</b>  | 218.33 ± 50.76 | 148.20 ± 42.42 |

**\*No data**

**Table 7S**

**The analytical of the ATR and CATR in group III's liver tissues (ng/g)**

| <b>Sample no.</b> | <b>ATR</b> | <b>CATR</b> |
|-------------------|------------|-------------|
| <b>P30-1</b>      | --*        | --          |
| <b>P30-2</b>      | 20.55      | --          |
| <b>P30-3</b>      | 16.53      | --          |
| <b>P30-4</b>      | --         | --          |
| <b>P30-5</b>      | --         | --          |
| <b>P30-6</b>      | --         | --          |
| <b>Mean ± SD</b>  | --         | --          |

**\*No data**
